# Supplementary material for: Cumulative dispensing of high oral corticosteroid doses for treating asthma in Australia
Source: PubMed Central journal article supplement (PMC7589219; doi:10.5694/mja2.50758), 2020-09-09
Supplement: MJA2-213-316-s001.pdf [file MJA2-213-316-s001.pdf]

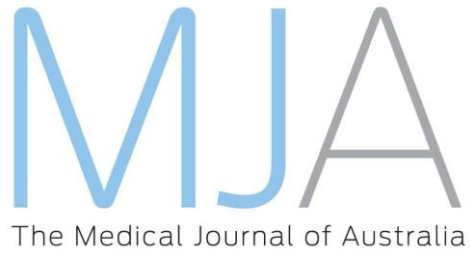

## **Supporting Information**

### **Supplementary tables**

**This appendix was part of the submitted manuscript and has been peer reviewed.  
It is posted as supplied by the authors.**

Appendix to: Hew M, McDonald VM, Bardin PG, et al. Cumulative dispensing of high oral corticosteroid doses for treating asthma in Australia. *Med J Aust* 2020; doi: 10.5694/mja2.50758.

**Table 1. Pilot algorithms for identifying people with asthma and excluding those with chronic obstructive pulmonary disease (COPD), benchmarked according to data for 70 353 people over 12 years of age with prescriber-submitted authority codes for asthma or COPD**

| Algorithm | Total number                                                                                                                                | Classification |                   |                   |                   | Ambiguous*        |      |
|-----------|---------------------------------------------------------------------------------------------------------------------------------------------|----------------|-------------------|-------------------|-------------------|-------------------|------|
|           |                                                                                                                                             | Asthma         |                   | COPD              |                   |                   |      |
|           |                                                                                                                                             | Correct        | Incorrect         | Correct           | Incorrect         |                   |      |
| 1         | > 44 years: COPD                                                                                                                            | 70 353         | 13 792<br>(33.8%) | 26 980<br>(66.2%) | 22 198<br>(81.3%) | 5117<br>(18.7%)   | 2266 |
| 2         | > 44 years: COPD; <i>or</i><br>≤ 44 years + any LABA (except salmeterol or formoterol), LAMA/LABA, LAMA (except tiotropium): COPD           | 70 353         | 13 221<br>(32.4%) | 27551<br>(67.6%)  | 22 638<br>(83.0%) | 4677<br>(17.0%)   | 2266 |
| 3         | Any LABA (except salmeterol or formoterol), LAMA/LABA, LAMA (except Spiriva Respimat): COPD                                                 | 70 353         | 34 038<br>(83.5%) | 6734<br>(16.5%)   | 11 274<br>(41.3%) | 16 041<br>(58.7%) | 2266 |
| 4†        | Any LABA (except salmeterol or formoterol), LAMA/LABA, LAMA (except tiotropium): COPD; <i>or</i><br>> 44 years + non-Spiriva Respimat: COPD | 70 353         | 33 831<br>(83.0%) | 6941<br>(17.0%)   | 12 059<br>(44.1%) | 15 256<br>(55.9%) | 2266 |
| 5         | Non-tiotropium LAMA: COPD                                                                                                                   | 70 353         | 38 815<br>(95.2%) | 1957<br>(4.8%)    | 2916<br>(10.7%)   | 24 399<br>(89.3%) | 2266 |
| 6         | > 44 years + tiotropium: COPD                                                                                                               | 70 353         | 33 207<br>(81.4%) | 7565<br>(18.6%)   | 11 257<br>(41.2%) | 16 058<br>(58.8%) | 2266 |
| 7         | Any LABA (except salmeterol or formoterol), LAMA/LABA, LAMA (except tiotropium): COPD                                                       | 70 353         | 37 496<br>(92.0%) | 3276<br>(8.0%)    | 8566<br>(31.4)    | 18 749<br>(68.6%) | 2266 |

LABA = long acting  $\beta$ -agonist; LAMA = long acting muscarinic antagonist.

\* Patients dispensed medication on prescriber-submitted authority codes for both asthma and COPD. during the time period.

† Selected to exclude people with COPD without prescriber-supplied authority codes.

**Table 2. Inhaled corticosteroid/long acting  $\beta$ -agonist fixed dose combination inhalers defined as high dose for analysis reported in Box 4**

| Inhaler, dose ( $\mu$ g)    | Components                |
|-----------------------------|---------------------------|
| Seretide Accuhaler 250/50   | Fluticasone + salmeterol  |
| Seretide Accuhaler 500/50   | Fluticasone + salmeterol  |
| Flutiform 250/10            | Fluticasone + eformoterol |
| Symbicort Rapihaler 200/6   | Budesonide + eformoterol  |
| Symbicort Turbuhaler 200/6  | Budesonide + eformoterol  |
| Symbicort Turbuhaler 400/12 | Budesonide + eformoterol  |
| Breo Ellipta 200/25         | Fluticasone + vilanterol  |
| DuoResp Spiromax 400/12     | Budesonide + formoterol   |

**Table 3. Benchmarking exercise for estimating classification error for 124 011 people classified as having asthma, 2014–2018**

For people with prescriber-provided diagnostic-specific authority codes:

- The authority codes for 1 August – 31 December 2018, allow 100% accurate classification of 49 087 people with asthma.
- Compared with this classification, classification by the chosen algorithm (Table 1, algorithm 4) missed 6941 people with asthma (corresponding to 14.1% of the group) and classified 15 256 people as having asthma (31.1% of 49 087) who did not have asthma according to authority coding.

For the overall asthma group:

- Of 124 011 people included, 49 087 were classified as having asthma according to prescriber-provided authority codes; 74 924 were classified with the algorithm.

For the group of 74 924 people classified with the algorithm:

- Estimated number of people with asthma missed: 14.1% of 74 924 = 10 594 people.
- People with chronic obstructive pulmonary disease (COPD) and other non-asthma conditions included in asthma group: 31.1% of 74 924 = 23 286 people.

Estimated classification error in the overall asthma group:

- Proportion of asthma patients missed is 10 594, corresponding to 8.5% of overall group.
- Proportion of included people with COPD and other non-asthma conditions: 23 286/124 011 = 18.7%.

**Table 4. Dispensing of medications for managing diabetes and osteoporosis to people aged 12 years or more in the 10% Pharmaceutical Benefits Scheme dispensing data sample, 2014–2018, by five-year cumulative prednisolone-equivalent exposure\* (data for Box 2 in the main text)**

|                          | No OCS  | 1–999 mg | 1000–2499 mg | ≥ 2500 mg | Total   |
|--------------------------|---------|----------|--------------|-----------|---------|
| Diabetes medications     |         |          |              |           |         |
| Numerator                | 20 958  | 24 161   | 11 354       | 9332      | 65 805  |
| Denominator              | 188 203 | 246 030  | 89 981       | 53 911    | 578 125 |
| Proportion               | 11.1%   | 9.8%     | 12.6%        | 17.3%     | 11.4%   |
| Osteoporosis medications |         |          |              |           |         |
| Numerator                | 10 738  | 11 609   | 6820         | 10 394    | 39 561  |
| Denominator              | 188 203 | 246 030  | 89 981       | 53 911    | 578 125 |
| Proportion               | 5.7%    | 4.7%     | 7.6%         | 19.3%     | 6.8%    |

\* All people in the 10% PBS sample dispensed OCS, whether dispensed inhalers or not, with the exception of “No OCS” group (only people dispensed inhalers). In each panel, > 2500 mg v < 1000 mg and 1000–2499 mg v < 1000 mg:  $P < 0.001$  (two-tailed test of proportions).
